# Supplementary material for: A NiCoP nanocluster-anchored porous Ti3C2Tx monolayer as high performance hydrogen evolution reaction electrocatalysts
Source: Royal Society of Chemistry journal article supplement (doi:10.1039/d1nr02601a), 2021-01-01
Supplement: d1nr02601a1.pdf [file d1nr02601a1.pdf]

## Electronic Supplementary Information

# NiCoP Nanoclusters-Anchored Porous $\text{Ti}_3\text{C}_2\text{T}_x$ Monolayer as High Performance Hydrogen Evolution Reaction Electrocatalysts.

*Sung M. Kang*<sup>a, †</sup>, *Minjun Kim*<sup>b, †</sup>, *Jeong Bok Lee*<sup>a</sup>, *Shiyu Xu*<sup>a</sup>, *N. Clament Sagaya Selvam*<sup>a</sup>, *Pil J. Yoo*<sup>a, b, \*</sup>

<sup>a</sup> School of Chemical Engineering, Sungkyunkwan University (SKKU), Suwon 16419, Republic of Korea.

<sup>b</sup> SKKU Advanced Institute of Nanotechnology (SAINT), Sungkyunkwan University (SKKU), Suwon 16419, Republic of Korea.

† Both authors contributed equally to this work.

\* Corresponding authors: [pjyoo@skku.edu](mailto:pjyoo@skku.edu)

# List of Figures

**Figure S1.** AFM images of the  $\text{Ti}_3\text{C}_2\text{T}_x$ , and  $\text{P-Ti}_3\text{C}_2\text{T}_x$ .

**Figure S2.** Zeta potential of a pristine  $\text{Ti}_3\text{C}_2\text{T}_x$  and  $\text{P-Ti}_3\text{C}_2\text{T}_x$ .

**Figure S3.** SEM images of the  $\text{P-Ti}_3\text{C}_2\text{T}_x@\text{NiCo}(\text{OH})_2$ , and  $\text{P-Ti}_3\text{C}_2\text{T}_x@\text{NiCoP}$ .

**Figure S4.** Energy dispersive X-ray spectroscopy (EDS) of  $\text{P-Ti}_3\text{C}_2\text{T}_x@\text{NiCoP}$ , elemental composition of  $\text{P-Ti}_3\text{C}_2\text{T}_x@\text{NiCoP}$ .

**Figure S5.** Nitrogen adsorption-desorption isotherm of  $\text{Ti}_3\text{C}_2\text{T}_x$ ,  $\text{P-Ti}_3\text{C}_2\text{T}_x$ , and  $\text{P-Ti}_3\text{C}_2\text{T}_x@\text{NiCoP}$ .

**Figure S6.** High-resolution XPS spectrum of Ti 2p for pristine  $\text{Ti}_3\text{C}_2\text{T}_x$ , and  $\text{P-Ti}_3\text{C}_2\text{T}_x$ .

**Figure S7.** High-resolution XPS spectrum of Ni 2p, Co 2p, and P 2p for pure NiCoP.

**Figure S8.** Comparison of Raman spectra of a pristine  $\text{Ti}_3\text{C}_2\text{T}_x$  film,  $\text{P-Ti}_3\text{C}_2\text{T}_x$  film, and  $\text{P-Ti}_3\text{C}_2\text{T}_x@\text{NiCoP}$  film.

**Figure S9.** Cyclic voltammograms measured in non-Faradaic region from 0.6 to 0.7 V at different scan rate for various catalysts in 0.5 M  $\text{H}_2\text{SO}_4$ .

**Figure S10.** Cyclic voltammograms measured in non-Faradaic region from 0.6 to 0.7 V at different scan rate for various catalysts in 1 M KOH.

**Figure S11.** ECSA normalized HER polarization curves evaluated in 0.5  $\text{H}_2\text{SO}_4$  and 1.0 M KOH for various catalysts.

# List of Tables

**Table S1.** Comparison of atomic ratio normalized by Ti for various samples obtained from ICP-OES measurements.

**Table S2.** Comparison of the HER performance of P-Ti<sub>3</sub>C<sub>2</sub>T<sub>x</sub>@NiCoP with other non-noble metal based electrocatalysts reported before.

**Table S3.** Summary of the HER performance, C<sub>dl</sub> and ECSA of various electrocatalysts measured in 0.5 M H<sub>2</sub>SO<sub>4</sub>.

**Table S4.** Summary of the HER performance, C<sub>dl</sub> and ECSA of various electrocatalysts measured in 1.0 M KOH.

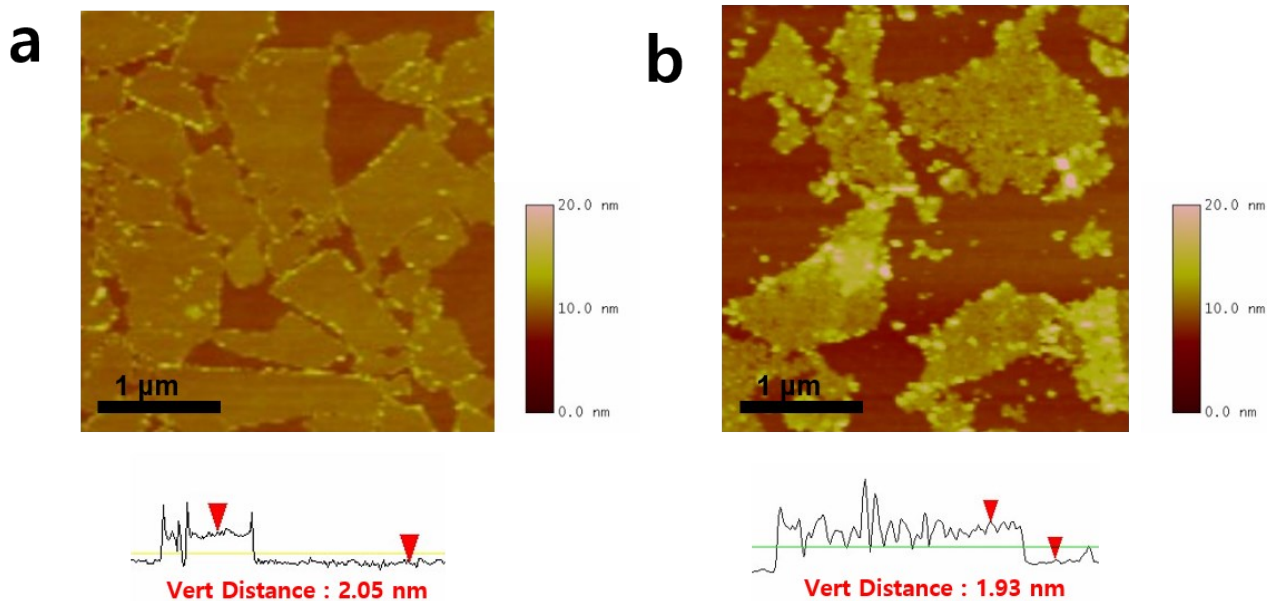

**Figure S1.** AFM images of the (a) pristine  $\text{Ti}_3\text{C}_2\text{T}_x$  and (b) P- $\text{Ti}_3\text{C}_2\text{T}_x$  nanosheets.

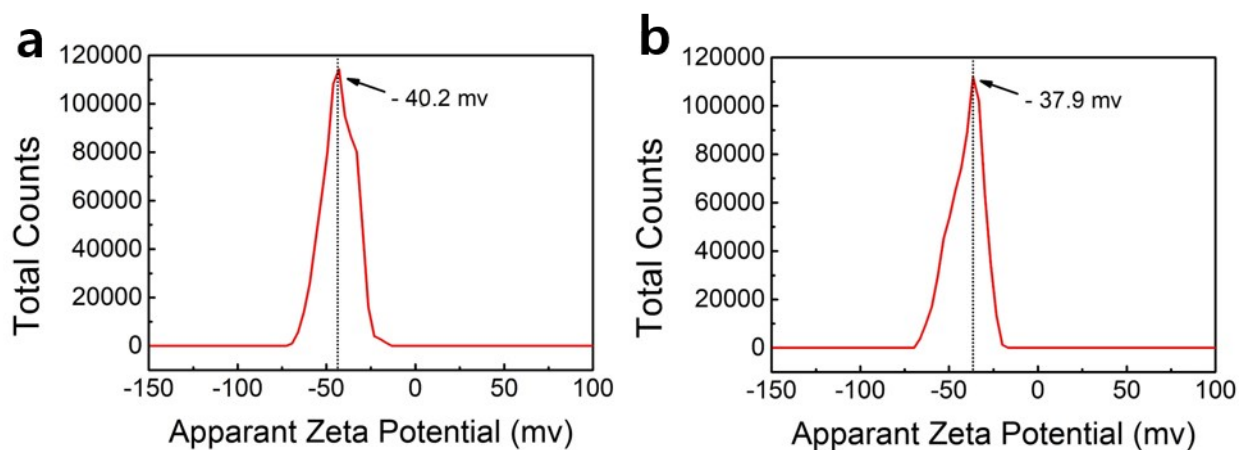

**Figure S2.** Comparison of zeta-potential values of (a) pristine  $\text{Ti}_3\text{C}_2\text{T}_x$  and (b) P- $\text{Ti}_3\text{C}_2\text{T}_x$  nanosheets.

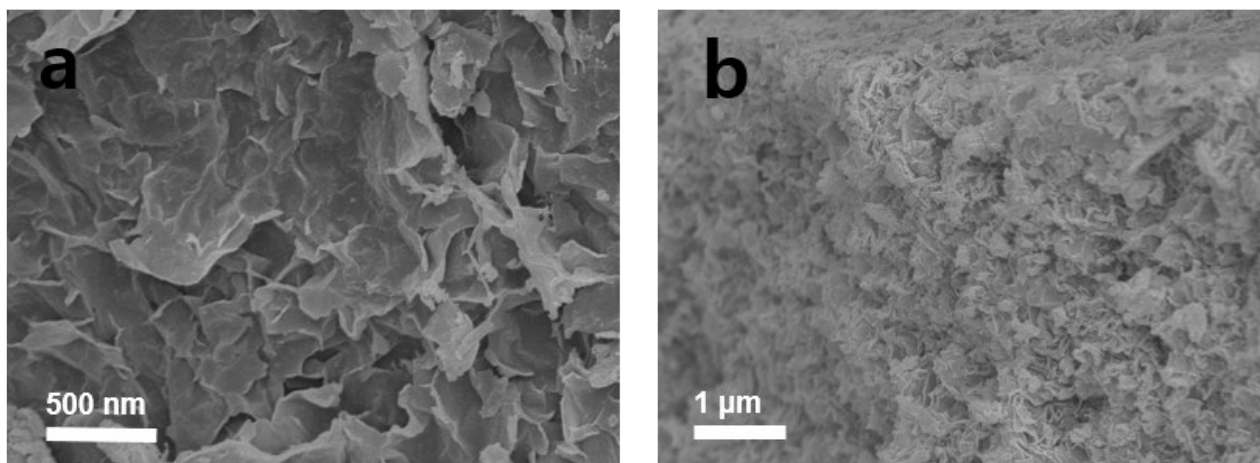

**Figure S3.** SEM images of (a) P-Ti<sub>3</sub>C<sub>2</sub>T<sub>x</sub>@NiCo(OH)<sub>2</sub> precursor and (b) P-Ti<sub>3</sub>C<sub>2</sub>T<sub>x</sub>@NiCoP 3D nanostructure.

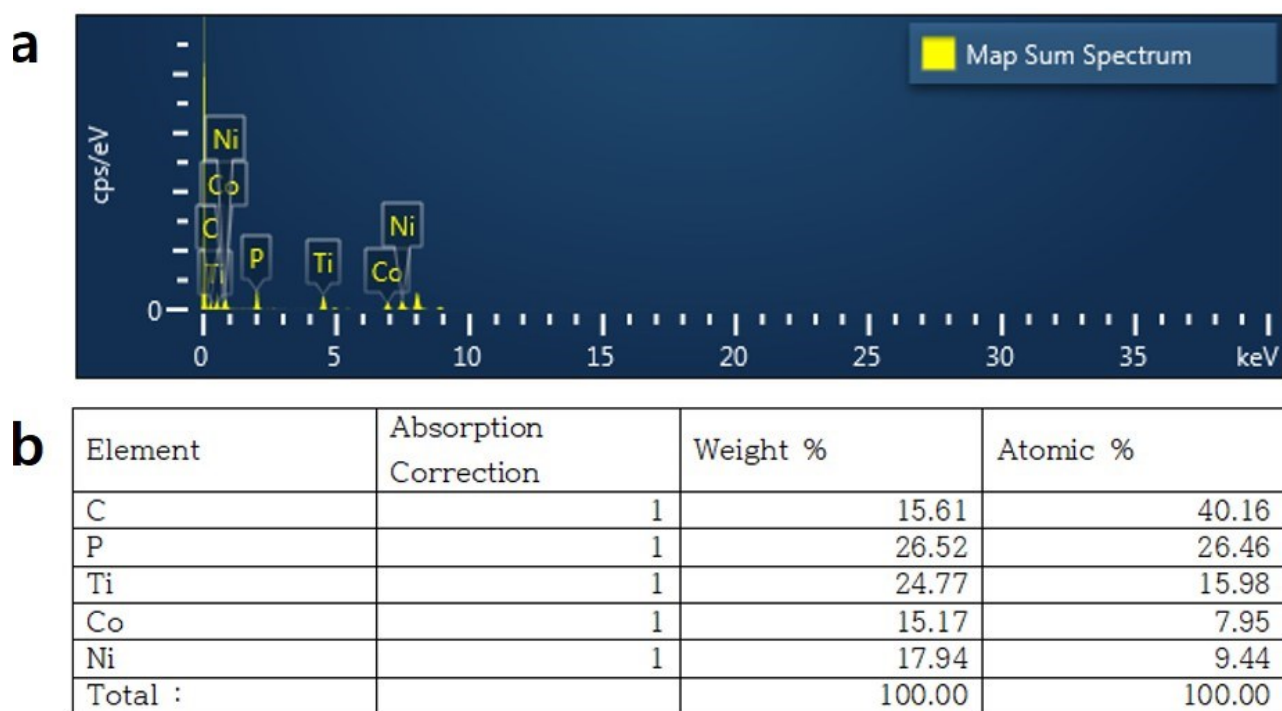

**Figure S4.** (a) Energy dispersive X-ray spectroscopy (EDS) of P-Ti<sub>3</sub>C<sub>2</sub>T<sub>x</sub>@NiCoP and (b) its elemental composition.

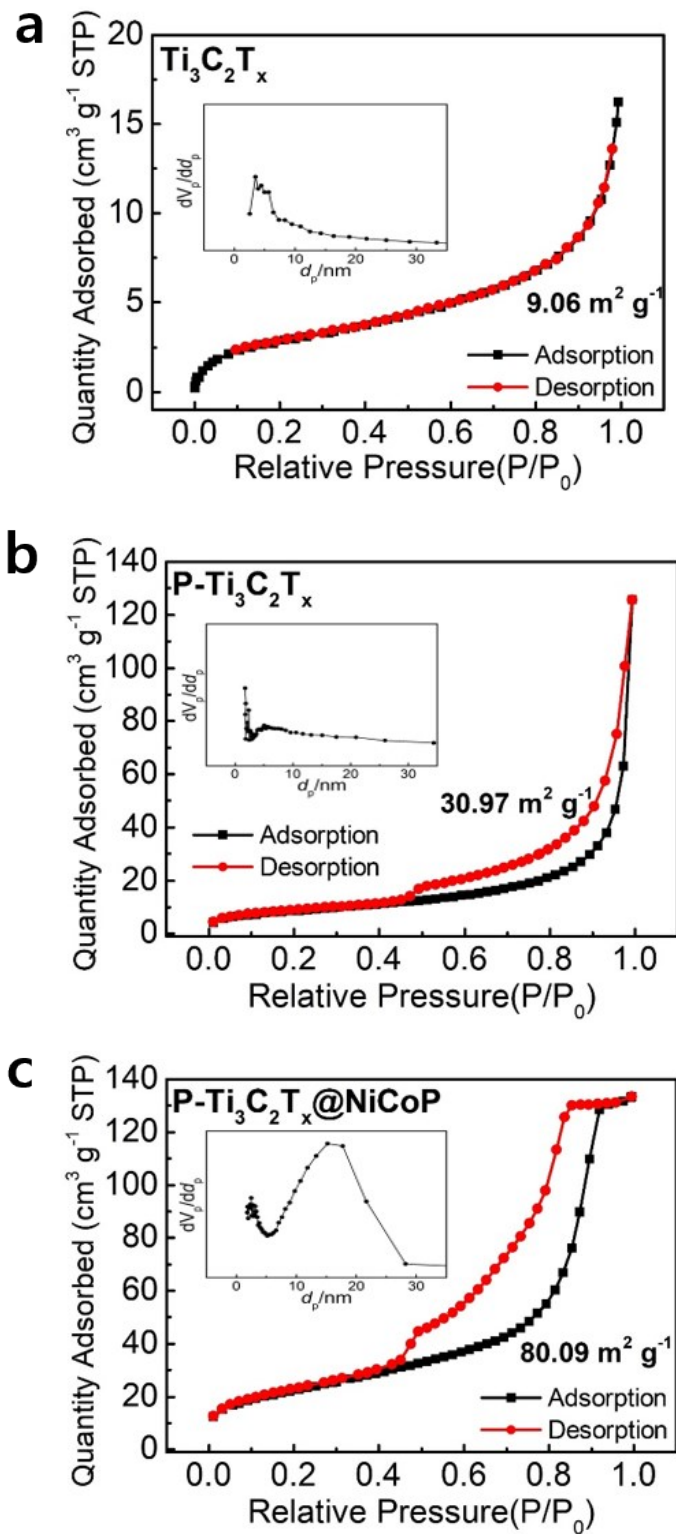

**Figure S5.** Nitrogen adsorption-desorption isotherms of (a)  $\text{Ti}_3\text{C}_2\text{T}_x$ , (b)  $\text{P-Ti}_3\text{C}_2\text{T}_x$ , and (c)  $\text{P-Ti}_3\text{C}_2\text{T}_x @ \text{NiCoP}$  3D nanostructures.

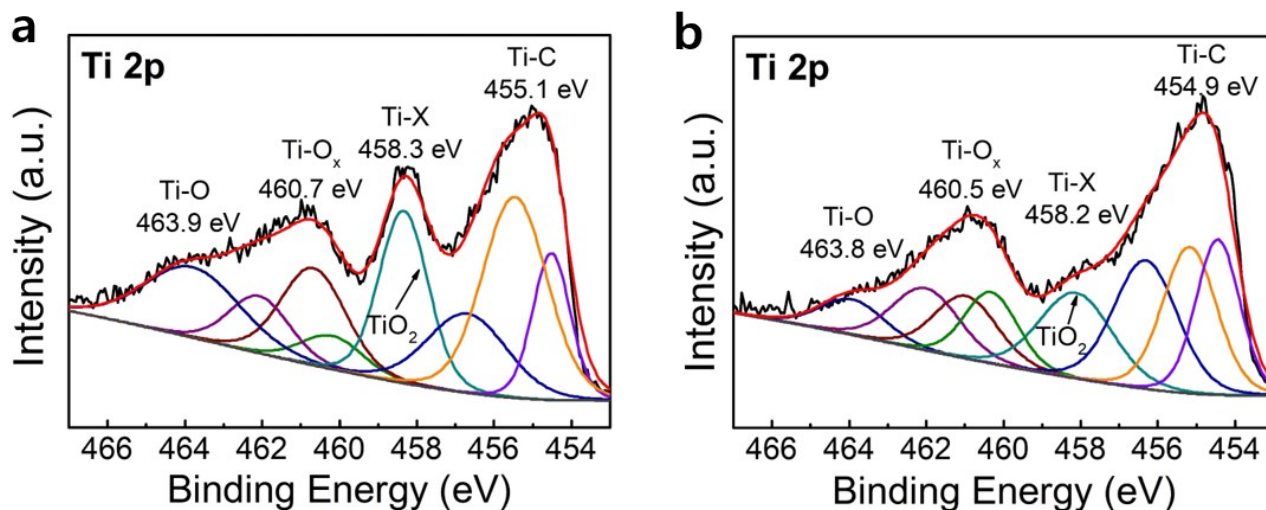

**Figure S6.** High-resolution XPS spectra of (a) Ti 2p for P-Ti<sub>3</sub>C<sub>2</sub>T<sub>x</sub>, and (b) Pristine Ti<sub>3</sub>C<sub>2</sub>T<sub>x</sub> nanosheets.

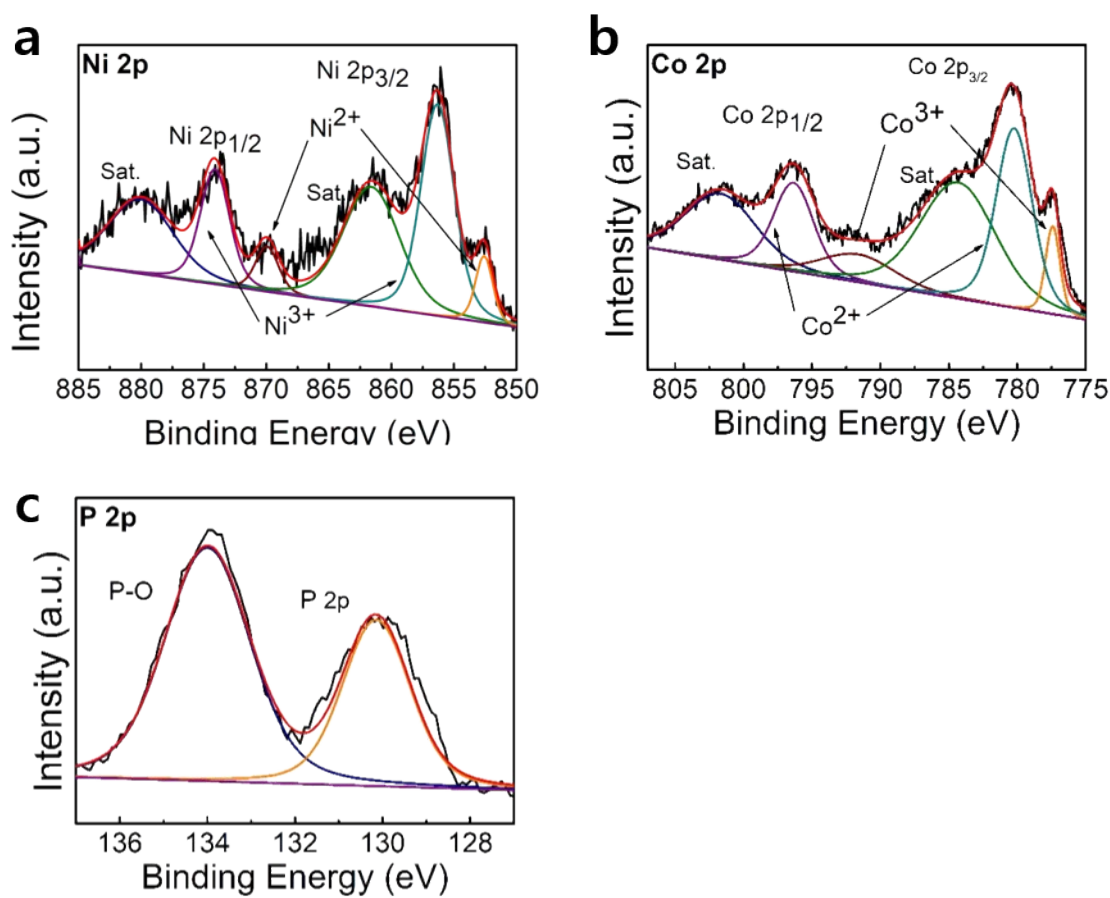

**Figure S7.** High-resolution XPS spectrum of (a) Ni 2p, (b) Co 2p, and (c) P 2p for pure NiCoP.

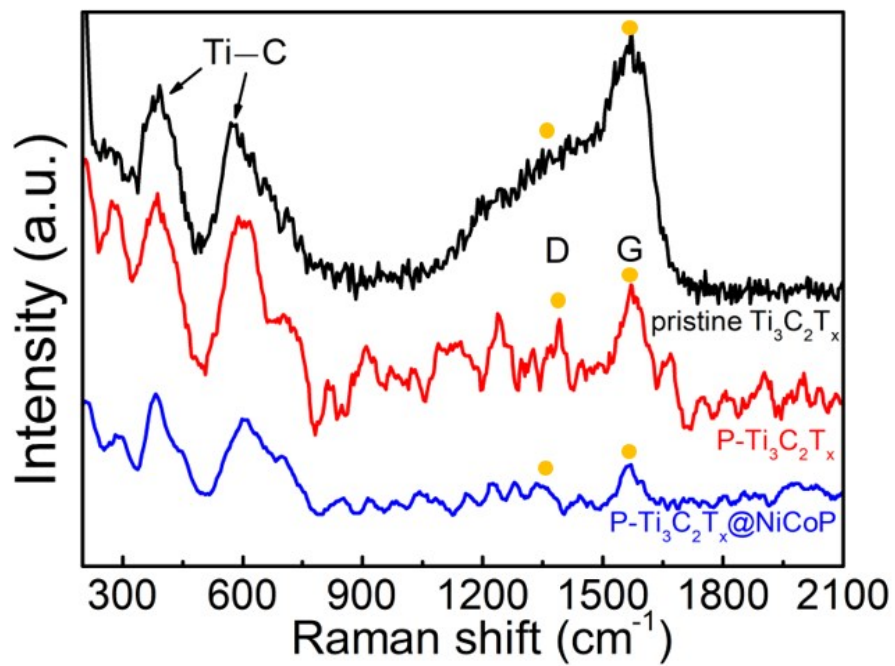

**Figure S8.** Comparison of Raman spectra of pristine Ti<sub>3</sub>C<sub>2</sub>T<sub>x</sub> (black, top), P-Ti<sub>3</sub>C<sub>2</sub>T<sub>x</sub> (red, middle), and P-Ti<sub>3</sub>C<sub>2</sub>T<sub>x</sub>@NiCoP 3D nanostructures (blue, bottom).



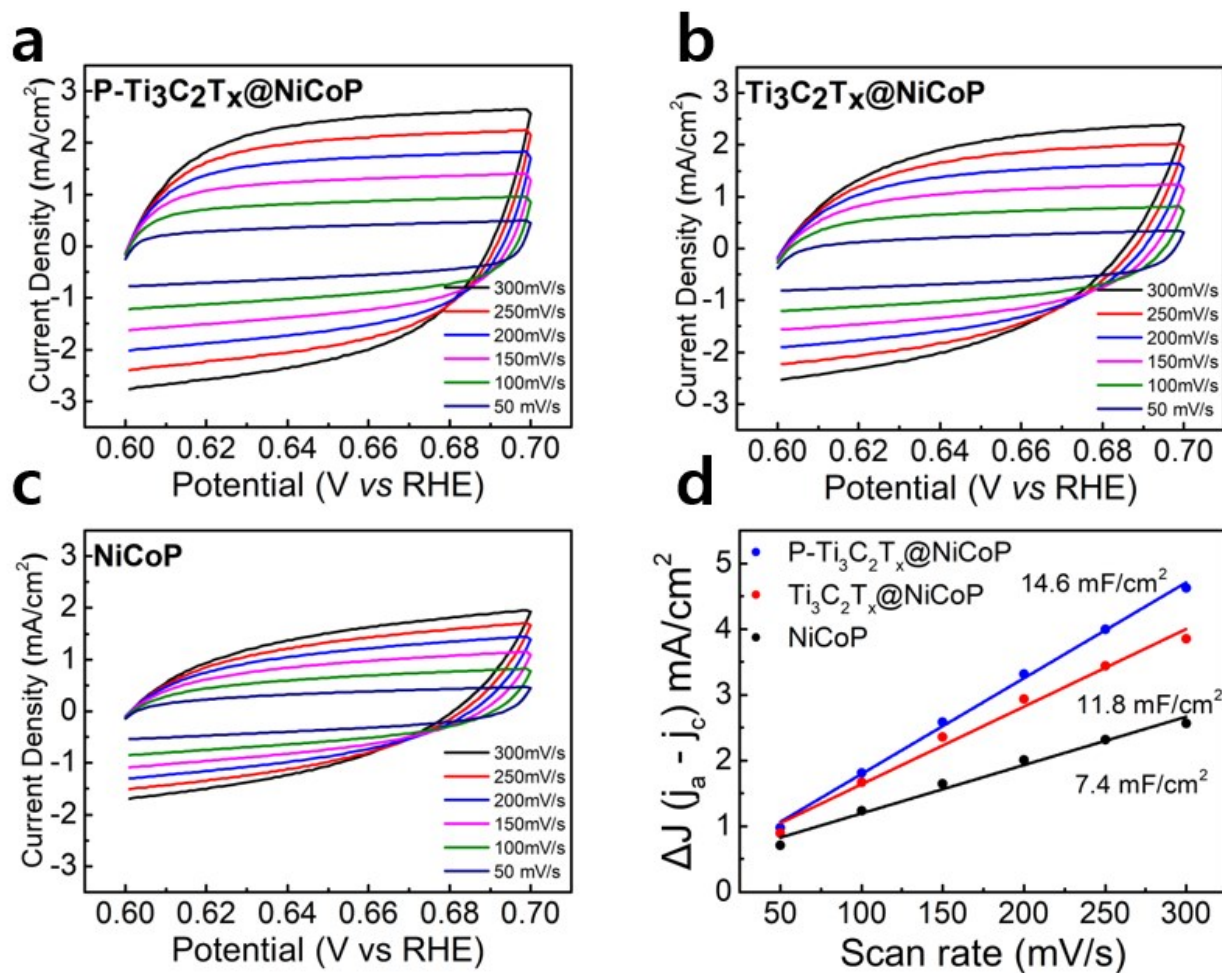

**Figure S9.** Cyclic voltammograms measured in non-Faradaic region of (a) P-Ti<sub>3</sub>C<sub>2</sub>T<sub>x</sub>@NiCoP, (b) Ti<sub>3</sub>C<sub>2</sub>T<sub>x</sub>@NiCoP, and (c) NiCoP electrodes at various scan rates for different catalysts in 0.5 M H<sub>2</sub>SO<sub>4</sub>. (d) Plots of current density differences ( $\Delta j$ ) against the scan rates at 0.65 V vs. RHE, where  $\Delta j$  is the difference between anodic and cathodic current densities in CV curves at different scan rates.

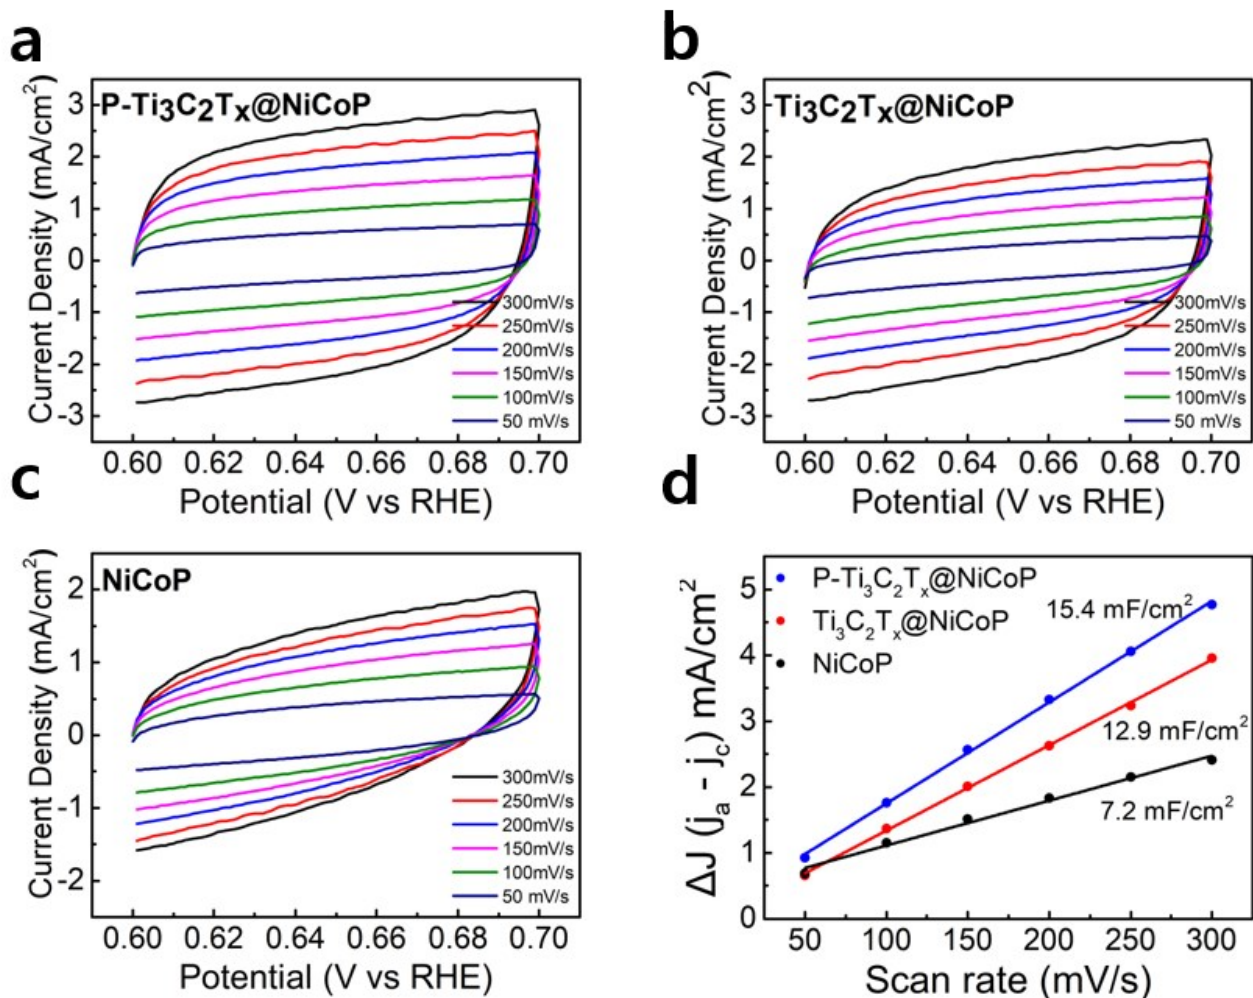

**Figure S10.** Cyclic voltammograms measured in non-Faradaic region of (a) P-Ti<sub>3</sub>C<sub>2</sub>T<sub>x</sub>@NiCoP, (b) Ti<sub>3</sub>C<sub>2</sub>T<sub>x</sub>@NiCoP, and (c) NiCoP electrodes at various scan rates for different catalysts in 1 M KOH. (d) the plots of current density differences ( $\Delta j$ ) against scan rates at 0.65 V vs. RHE, where  $\Delta j$  is the difference between anodic and cathodic current densities in CV curves at different scan rates.

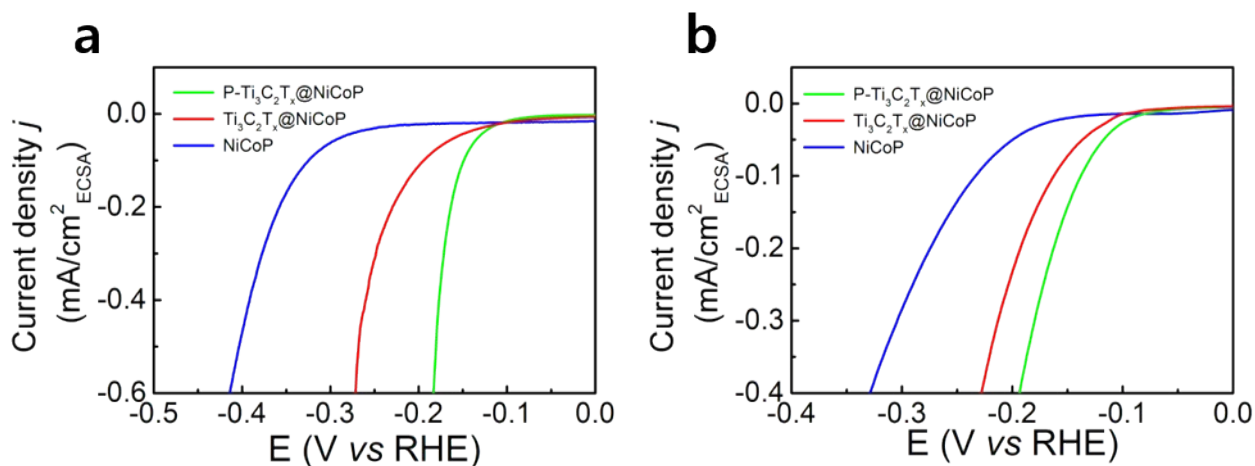

**Figure S11.** ECSA-normalized HER polarization curves evaluated under (a) 0.5 H<sub>2</sub>SO<sub>4</sub> and (b) 1.0 M KOH condition for various catalysts. Note that presented HER polarization curves in Fig. 4a and Fig. 5a were normalized by ECSA values as summarized in Table S3 and S4 to compare the intrinsic catalytic activity of various samples.

**Table S1.** Comparison of atomic ratio normalized by Ti for various samples obtained from ICP-OES measurements.

| Sample                                                 | Ti/Ti | Ni/Ti | Co/Ti | P/Ti |
|--------------------------------------------------------|-------|-------|-------|------|
| P-Ti <sub>3</sub> C <sub>2</sub> T <sub>x</sub> @NiCoP | 1     | 0.47  | 0.86  | 1.43 |
| Ti <sub>3</sub> C <sub>2</sub> T <sub>x</sub> @NiCoP   | 1     | 0.31  | 0.72  | 1.26 |

**Table S2.** Comparison of the HER performance of P-Ti<sub>3</sub>C<sub>2</sub>T<sub>x</sub>@NiCoP with other non-noble metal based electrocatalysts reported before.

| Catalysts                                               | Overpotential<br>(mV)<br>$\eta_{10 \text{ mA cm}^{-2}}$ | Tafel slope<br>(mV dec <sup>-1</sup> ) | Electrolyte                              | Reference        |
|---------------------------------------------------------|---------------------------------------------------------|----------------------------------------|------------------------------------------|------------------|
| <b>P-Ti<sub>3</sub>C<sub>2</sub>T<sub>x</sub>@NiCoP</b> | <b>101</b>                                              | <b>69</b>                              | <b>1 M KOH</b>                           | <b>This work</b> |
|                                                         | <b>115</b>                                              | <b>76</b>                              | <b>0.5 M H<sub>2</sub>SO<sub>4</sub></b> |                  |
| NiCo <sub>2</sub> O <sub>4</sub> /NiCoP                 | 198                                                     | 91                                     | 1 M KOH                                  | [1]              |
| NiCoP/CNF                                               | 130                                                     | 83                                     | 1 M KOH                                  | [2]              |
| NiCoP NPs/Ti,                                           | 97                                                      | 50                                     | 1 M KOH                                  | [3]              |
| NiCoP-CoP/NF                                            | 73                                                      | 91.3                                   | 1 M KOH                                  | [4]              |
| NiCo <sub>2</sub> O <sub>4</sub> /Ni <sub>2</sub> P/NAs | 141                                                     | 86                                     | 1 M KOH                                  | [5]              |
|                                                         | 116                                                     | 37                                     | 0.5 M H <sub>2</sub> SO <sub>4</sub>     |                  |
| Ni <sub>5</sub> P <sub>4</sub> -NiP <sub>2</sub> /NF    | 92                                                      | 52.8                                   | 1 M KOH                                  | [6]              |
| NiFe LDH@NiCoP                                          | 120                                                     | 88.2                                   | 1 M KOH                                  | [7]              |
| S-NiCoP NW/CFP                                          | 102                                                     | 63.3                                   | 1 M KOH                                  | [8]              |
| NiCoP-C(TPA)/NF                                         | 78                                                      | 73.4                                   | 1 M KOH                                  | [9]              |
|                                                         | 94                                                      | 81.1                                   | 0.5 M H <sub>2</sub> SO <sub>4</sub>     |                  |
| O-NiCoP/Ni <sub>2</sub> P                               | 58                                                      | 68.8                                   | 1 M KOH                                  | [10]             |
| O-doped Co <sub>2</sub> P                               | 101                                                     | 69.4                                   | 1 M KOH                                  | [11]             |
| CoP-MOF                                                 | 34                                                      | 63                                     | 1 M KOH                                  | [12]             |
|                                                         | 27                                                      | 56                                     | 0.5 M H <sub>2</sub> SO <sub>4</sub>     |                  |
| NiPS <sub>3</sub> /Ni <sub>2</sub> P                    | 85                                                      | 82                                     | 1 M KOH                                  | [13]             |
| CoP/NiCoP/NC                                            | 75                                                      | 58                                     | 1 M KOH                                  | [14]             |
|                                                         | 60                                                      | 60                                     | 0.5 M H <sub>2</sub> SO <sub>4</sub>     |                  |
| CoP/NiCoP                                               | 121                                                     | 65                                     | 1 M KOH                                  | [15]             |
|                                                         | 90                                                      | 68                                     | 0.5 M H <sub>2</sub> SO <sub>4</sub>     |                  |

**Table S3.** Summary of the HER performance,  $C_{dl}$  and ECSA of various electrocatalysts measured in 0.5 M  $H_2SO_4$ .

| Catalysts                                              | $\eta_{10mA\ cm^{-2}}$<br>(mV) | Tafel slopes<br>(mV dec <sup>-1</sup> ) | $C_{dl}$<br>(mF cm <sup>-2</sup> ) | ECSA |
|--------------------------------------------------------|--------------------------------|-----------------------------------------|------------------------------------|------|
| P-Ti <sub>3</sub> C <sub>2</sub> T <sub>x</sub> @NiCoP | 115                            | 76                                      | 7.4                                | 185  |
| Ti <sub>3</sub> C <sub>2</sub> T <sub>x</sub> @NiCoP   | 145                            | 85                                      | 11.8                               | 295  |
| NiCoP                                                  | 178                            | 125                                     | 14.6                               | 365  |

**Table S4.** Summary of the HER performance,  $C_{dl}$  and ECSA of various electrocatalysts measured in 1.0 M KOH.

| Catalysts                                              | $\eta_{10mA\ cm^{-2}}$<br>(mV) | Tafel slopes<br>(mV dec <sup>-1</sup> ) | $C_{dl}$<br>(mF cm <sup>-2</sup> ) | ECSA  |
|--------------------------------------------------------|--------------------------------|-----------------------------------------|------------------------------------|-------|
| P-Ti <sub>3</sub> C <sub>2</sub> T <sub>x</sub> @NiCoP | 101                            | 69                                      | 7.2                                | 180   |
| Ti <sub>3</sub> C <sub>2</sub> T <sub>x</sub> @NiCoP   | 121                            | 78                                      | 12.9                               | 322.5 |
| NiCoP                                                  | 170                            | 101                                     | 15.4                               | 385   |

**Note:** ECSA for HER was determined based on the specific capacitance ( $C_s$ ) of the NiCoP (0.040 mF cm<sup>-2</sup>) from the literature and the obtained ECSA values of the catalysts were normalized by the ECSA value of NiCoP. [16].

## References

- [1] W. Jin, J. Chen, H. Wu, N. Zang, Q. Li, W. Cai and Z. Wu, *Catalysis Science & Technology*, 2020, **10**, 5559-5565.
- [2] S. Surendran, S. Shanmugapriya, A. Sivanantham, S. Shanmugam and R. Kalai Selvan, *Advanced Energy Materials*, 2018, **8**, 1800555.
- [3] C. Wang, J. Jiang, T. Ding, G. Chen, W. Xu and Q. Yang, *Advanced Materials Interfaces*, 2016, **3**, 1500454.
- [4] H. Liu, X. Ma, H. Hu, Y. Pan, W. Zhao, J. Liu, X. Zhao, J. Wang, Z. Yang and Q. Zhao, *ACS applied materials & interfaces*, 2019, **11**, 15528-15536.
- [5] Q. Wang, H. Wang, X. Cheng, M. Fritz, D. Wang, H. Li, A. Bund, G. Chen and P. Schaaf, *Materials Today Energy*, 2020, **17**, 100490.
- [6] S. Liu, C. Hu, C. Lv, J. Cai, M. Duan, J. Luo, J. Song, Y. Shi, C. Chen and D. Luo, *International Journal of Hydrogen Energy*, 2019, **44**, 17974-17984.
- [7] H. Zhang, X. Li, A. Hähnel, V. Naumann, C. Lin, S. Azimi, S. L. Schweizer, A. W. Maijenburg and R. B. Wehrspohn, *Advanced Functional Materials*, 2018, **28**, 1706847.
- [8] Y. Qi, L. Zhang, L. Sun, G. Chen, Q. Luo, H. Xin, J. Peng, Y. Li and F. Ma, *Nanoscale*, 2020, **12**, 1985-1993.
- [9] S. Sirisomboonchai, S. Li, A. Yoshida, S. Kongparakul, C. Samart, Y. Kansha, X. Hao, A. Abudula and G. Guan, *Catalysis Science & Technology*, 2019, **9**, 4651-4658.
- [10] Y. Wen, J. Qi, D. Zhao, J. Liu, P. Wei, X. Kang and X. Li, *Applied Catalysis B: Environmental*, 2021, **293**, 120196.
- [11] T. L. L. Doan, D. T. Tran, D. C. Nguyen, H. T. Le, N. H. Kim and J. H. Lee, *Applied Catalysis B: Environmental*, 2020, **261**, 118268.
- [12] T. Liu, P. Li, N. Yao, G. Cheng, S. Chen, W. Luo and Y. Yin, *Angewandte Chemie*, 2019, **131**, 4727-4732.
- [13] Q. Liang, L. Zhong, C. Du, Y. Luo, J. Zhao, Y. Zheng, J. Xu, J. Ma, C. Liu and S. Li, *ACS nano*, 2019, **13**, 7975-7984.
- [14] R. Boppella, J. Tan, W. Yang and J. Moon, *Advanced Functional Materials*, 2019, **29**, 1807976.
- [15] X. Liu, S. Deng, D. Xiao, M. Gong, J. Liang, T. Zhao, T. Shen and D. Wang, *ACS applied materials & interfaces*, 2019, **11**, 42233-42242.
- [16] S. Sirisomboonchai, S. Li, A. Yoshida, S. Kongparakul, C. Samart, Y. Kansha, X. Hao, A. Abudula and G. Guan, *Catalysis Science & Technology*, 2019, **9**, 4651.
